# Supplementary material for: Cellular Senescence in Human Aldosterone-Producing Adrenocortical Cells and Related Disorders
Source: MDPI journal article supplement (doi:10.3390/biomedicines9050567), 2021-05-18
Supplement: s1 [file s1]

## Supplementary Material

**Table S1.** Clinicopathological characteristics of APA group.

| Case   | Gender/<br>Age | Res.<br>Side | APA<br>size<br>(cm) | BMI<br>(Kg/m <sup>2</sup> ) | SBP<br>(mmHg) | DBP<br>(mmHg) | K<br>(mmol/l) | PAC<br>(ng/dl) | PRA<br>(ng/mL/h) | ARR  | eGFR<br>(ml/min) | Genotype |
|--------|----------------|--------------|---------------------|-----------------------------|---------------|---------------|---------------|----------------|------------------|------|------------------|----------|
| 1 APA  | F/29           | R            | 18                  | 21,51                       | 127           | 87            | 3,6           | 63,3           | 0,1              | 633  | 139              | KCNJ5    |
| 2 APA  | F/29           | R            | 21                  | 26,59                       | 123           | 82            | 4,3           | 81,1           | 0,1              | 811  | 103              | KCNJ5    |
| 3 APA  | M/33           | L            | 15                  | 26,81                       | 150           | 100           | 4,3           | 71,5           | 0,4              | 179  | 88               | KCNJ5    |
| 4 APA  | M/37           | L            | 13                  | 27,97                       | 110           | 66            | 3,5           | 12,0           | 0,6              | 20   | 99               | KCNJ5    |
| 5 APA  | M/37           | R            | 11                  | 29,44                       | 147           | 101           | 4,0           | 45,1           | 0,5              | 90   | 55               | KCNJ5    |
| 6 APA  | M/41           | R            | 33                  | 24,16                       | 153           | 110           | 3,5           | 41,4           | 0,2              | 207  | 68               | KCNJ5    |
| 7 APA  | M/41           | L            | 10                  | 20,81                       | 125           | 78            | 2,9           | 19,0           | 0,3              | 63   | 67               | WT       |
| 8 APA  | M/42           | R            | 6                   | 33,41                       | 120           | 75            | 3,1           | 31,9           | 2,4              | 13   | 85               | KCNJ5    |
| 9 APA  | F/46           | R            | 14                  | 24,15                       | 122           | 69            | 3,6           | 60,0           | 1,1              | 55   | 84               | KCNJ5    |
| 10 APA | M/52           | R            | 6                   | 18,69                       | 127           | 85            | 3,7           | 33,5           | 0,2              | 168  | 85               | WT       |
| 11 APA | F/53           | L            | 9                   | 26,72                       | 135           | 100           | 3,6           | 21,5           | 0,4              | 54   | 84               | KCNJ5    |
| 12 APA | M/55           | R            | 6                   | 22,91                       | 157           | 85            | 3,2           | 34,8           | 0,2              | 174  | 90               | WT       |
| 13 APA | M/57           | L            | 26                  | 20,15                       | 111           | 77            | 3,0           | 283,1          | 0,1              | 2831 | 51               | KCNJ5    |
| 14 APA | M/59           | R            | 17                  | 26,73                       | 140           | 93            | 3,7           | 88,4           | 0,2              | 442  | 68               | KCNJ5    |
| 15 APA | F/60           | L            | 10                  | 28,86                       | 146           | 83            | 3,8           | 33,2           | 0,1              | 332  | 76               | WT       |
| 16 APA | M/60           | R            | 5                   | 24,56                       | 131           | 66            | 4,3           | 43,8           | 0,2              | 219  | 83               | WT       |
| 17 APA | M/61           | L            | 10                  | 20,62                       | 183           | 115           | 3,4           | 31,1           | 0,3              | 104  | 71               | KCNJ5    |
| 18 APA | M/61           | L            | 9                   | 23,8                        | 169           | 104           | 4,0           | 27,0           | 0,4              | 68   | 88               | WT       |
| 19 APA | M/62           | L            | 8,5                 | 21,51                       | 164           | 102           | 4,3           | 16,6           | 0,2              | 83   | 29               | KCNJ5    |
| 20 APA | M/63           | L            | 7                   | 26,52                       | 132           | 85            | 4,0           | 19,8           | 0,1              | 198  | 63               | WT       |
| 21 APA | M/64           | L            | 5                   | 23,59                       | 118           | 80            | 4,1           | 29,2           | 0,2              | 146  | 76               | KCNJ5    |
| 22 APA | M/64           | L            | 10                  | 26,56                       | 162           | 99            | 4,0           | 41,9           | 0,2              | 210  | 93               | WT       |
| 23 APA | M/67           | L            | 12                  | 23,03                       | 163           | 104           | 3,9           | 51,7           | 0,2              | 259  | 67               | KCNJ5    |
| 24 APA | M/67           | L            | 6                   | 20,49                       | 118           | 83            | 3,4           | 28,2           | 0,3              | 94   | 76               | WT       |
| 25 APA | F/68           | R            | 24                  | 22,76                       | 122           | 81            | 4,2           | 62,6           | 0,1              | 626  | 29               | KCNJ5    |
| 26 APA | F/68           | L            | 18                  | 27,47                       | 152           | 84            | 3,1           | 44,4           | 0,1              | 444  | 75               | KCNJ5    |
| 27 APA | M/70           | R            | 21                  | 25,34                       | 132           | 86            | 3,3           | 60,4           | 0,2              | 302  | 41               | KCNJ5    |
| 28 APA | M/71           | R            | 8                   | 25,23                       | 136           | 71            | 2,9           | 59,5           | 0,2              | 298  | 44               | WT       |
| 29 APA | F/72           | L            | 13                  | 23,78                       | 150           | 86            | 3,8           | 58,0           | 0,2              | 290  | 88               | WT       |
| 30 APA | M/73           | R            | 7                   | 27,01                       | 137           | 73            | 3,3           | 41,6           | 0,2              | 208  | 57               | WT       |

**Table S2.** Clinicopathological characteristics of IHA group.

| Case  | Gender /<br>Age | Res.<br>Side | SBP<br>(mmHg) | DBP<br>(mmHg) | K<br>(mmol/l) | PAC<br>(ng/dl) | PRA<br>(ng/mL/h) | ARR  |
|-------|-----------------|--------------|---------------|---------------|---------------|----------------|------------------|------|
| 1 IHA | M/60            | R            | 129           | 96            | 4,7           | 17,8           | 0,3              | 59,3 |
| 2 IHA | M/60            | R            | 128           | 60            | 4,6           | 12,8           | 0,1              | 128  |
| 3 IHA | M/33            | L            | 118           | 78            | 4,6           | 18,2           | 0,3              | 60,7 |
| 4 IHA | M/37            | L            | 103           | 67            | 3,7           | 23,7           | 0,3              | 79   |
| 5 IHA | M/37            | R            | 146           | 98            | 4,4           | 18,9           | 0,5              | 37,8 |

|        |      |   |     |     |     |      |     |       |
|--------|------|---|-----|-----|-----|------|-----|-------|
| 6 IHA  | M/41 | R | 115 | 80  | 5   | 23,5 | 0,2 | 117,5 |
| 7 IHA  | M/41 | L | 117 | 85  | 3,8 | 39,1 | 0,2 | 195,5 |
| 8 IHA  | M/42 | R | 126 | 89  | 3,6 | 14,3 | 0,2 | 71,5  |
| 9 IHA  | F/46 | R | 150 | 106 | 4,5 | 21,7 | 0,9 | 24,1  |
| 10 IHA | M/52 | R | 137 | 81  | 3,9 | 61,8 | 0,4 | 154,5 |

**Table S3.** Clinicopathological characteristics of NA group.

| Case  | Gender/Age | Res. Side | Diagnosis             | Hypertension | eGFR (ml/min) |
|-------|------------|-----------|-----------------------|--------------|---------------|
| 1 NA  | F/33       | R         | Liver Sarcoma         | NO           | 143.00        |
| 2 NA  | M/41       | R         | Pancreatic Cancer     | YES          | 88.00         |
| 3 NA  | F/45       | L         | Pancreatic Cancer     | NO           | 107.00        |
| 4 NA  | M/51       | L         | Renal Cancer          | NO           | 64.00         |
| 5 NA  | M/54       | R         | Renal Cancer          | NO           | 58.00         |
| 6 NA  | F/54       | R         | Retroperitoneal tumor | NO           | 109.00        |
| 7 NA  | M/58       | L         | Chronic Pancreatitis  | NO           | 106.00        |
| 8 NA  | M/61       | R         | Renal Cancer          | YES          | 8.00          |
| 9 NA  | F/61       | R         | Pancreatic Cancer     | YES          | 84.00         |
| 10 NA | F/62       | R         | Renal Cancer          | YES          | 4.00          |
| 11 NA | F/64       | L         | Renal Cancer          | YES          | 61.00         |
| 12 NA | M/65       | R         | Renal Cancer          | YES          | 56.00         |
| 13 NA | M/66       | L         | Renal Cancer          | YES          | 65.00         |
| 14 NA | F/71       | R         | Pancreatic Cancer     | NO           | 80.00         |
| 15 NA | M/73       | L         | Pancreatic Cancer     | YES          | 91.00         |
| 16 NA | M/73       | R         | Renal Cancer          | YES          | 48.00         |
| 17 NA | M/76       | L         | Renal Cancer          | YES          | 72.00         |
| 18 NA | F/77       | L         | Renal Cancer          | YES          | 30.00         |
| 19 NA | M/78       | L         | Renal Cancer          | YES          | 81.00         |

Clinicopathological characteristics of APA (S1), IHA (S2) and NA (S3) patients. Blood pressure levels for APA and IHA cohort were measured before adrenal vein sampling (AVS), after withdrawal of renin angiotensin aldosterone system (RAAS)-inhibitors, including mineralocorticoid receptor antagonists (MRAs). NA cohort definition of hypertension (YES/NO) was based on ESC/ESH 2018 Guidelines for the management of arterial hypertension. Res. Side, resected side; R, right and L, left; Age, age at surgery; BMI, body mass index; SBP, systolic blood pressure; DBP, diastolic blood pressure; K, potassium; PAC, plasma aldosterone concentration; PRA, plasma renin activity; ARR, aldosterone-to-renin ratio; eGFR, estimated glomerular filtration rate; WT, wild type.

**Table S4.** IHC protocols and primary antibodies.

| Antibody | Antigen Retrieval Treatment                     | Isotype                  | Source/Reference                         | Control Tissue            | Dilution |
|----------|-------------------------------------------------|--------------------------|------------------------------------------|---------------------------|----------|
| CYP11B2  | Autoclave 121 °C 5min<br>50× Envision TM FLEX   | Mouse IgG1<br>Monoclonal | Provided by Prof. Celso<br>Gomez Sanchez | APA                       | 1:500    |
| p16      | Autoclave 121 °C 5min,<br>0.05 M Citrate Buffer | Mouse IgG1<br>Monoclonal | BD Pharmingen                            | Colorectal<br>Cancer      | 1:100    |
| p21      | Autoclave 121 °C 5min<br>0.05 M Citrate Buffer  | Mouse IgG1<br>Monoclonal | BD Pharmingen                            | Colorectal<br>Cancer      | 1:100    |
| γH2AX    | Autoclave 121°C 5min<br>pH9 Buffer              | Rabbit mono-<br>clonal   | Cell Signaling Technology                | Renal cell car-<br>cinoma | 1:100    |

Antibodies and protocols used for IHC. All the antibodies were used at the same concentration as shown in the table for all other samples.

**Table S5.** Clinical factors comparisons in *KCNJ5*-mutated and WT APAs.

| Variable                 | <i>KCNJ5</i> (N = 18)  | WT (N = 12)             | p-value |
|--------------------------|------------------------|-------------------------|---------|
| Gender (ref. Male)       | 12.00 (66.67)          | 10.00 (83.33)           | 0.419   |
| Age at Surgery (y)       | 55.00 (37.00; 64.75)   | 62.00 (56.25; 70.00)    | 0.072   |
| BMI (Kg/m <sup>2</sup> ) | 24.75 (22.45; 26.97)   | 24.18 (21.33; 26.55)    | 0.459   |
| SBP (mmHg)               | 133.50 (121.5; 152.25) | 136.50 (128.00; 155.25) | 0.511   |
| DBP (mmHg)               | 86.50 (79.25; 101.25)  | 84.00 (74.25; 85.75)    | 0.271   |
| K <sup>+</sup> (mmol/l)  | 3.60 (3.37; 4.12)      | 3.75 (3.22; 4.00)       | 0.671   |
| PAC (ng/dl)              | 48.40 (30.62; 65.35)   | 34.15 (27.30; 43.32)    | 0.103   |
| PRA (ng/mL/h)            | 0.20 (0.10; 0.42)      | 0.20 (0.20; 0.27)       | 0.640   |
| ARR                      | 192.9 (75.87; 489.50)  | 203.00 (112.37; 272.25) | 0.849   |
| eGFR (ml/min)            | 72.95 (53.86; 85.62)   | 79.83 (64.20; 88.11)    | 0.512   |

Clinical factors comparisons in *KCNJ5*-mutated and *KCNJ5*-wild type APAs. The value was reported with accuracy to one decimal point for all the cases analyzed. WT, wild type; BMI, body mass index; SBP, systolic blood pressure; DBP, diastolic blood pressure, K<sup>+</sup>, potassium; PAC, plasma aldosterone concentration; PRA, plasma renin activity; ARR, aldosterone-to-renin ratio; eGFR, estimated glomerular filtration rate.

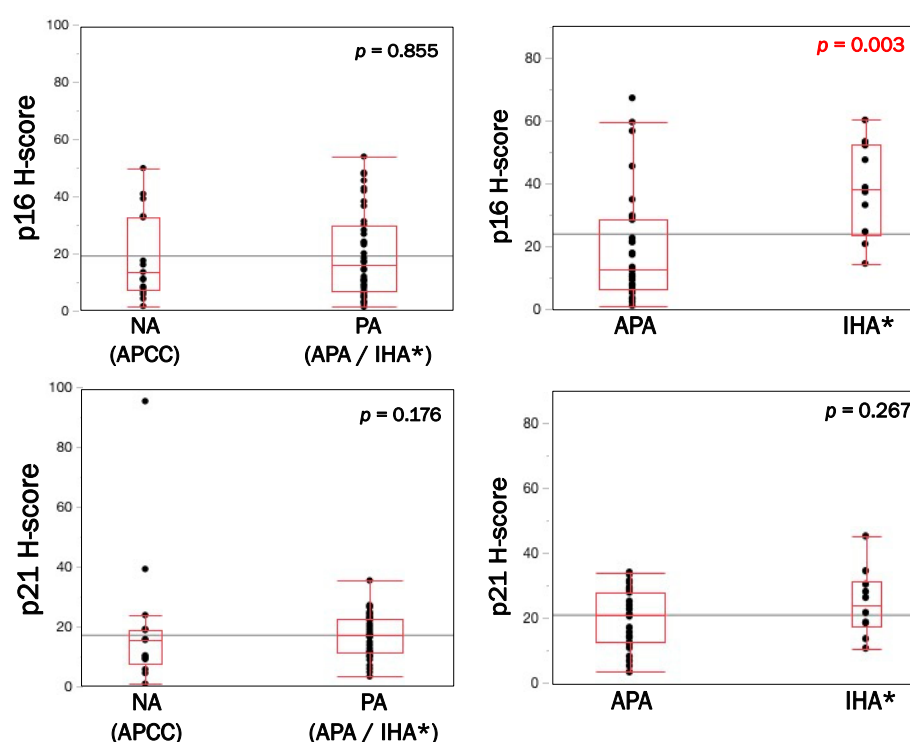

**Figure S1.** p16-p21 status in CYP11B2-positive (aldosterone-producing) cells. p16-p21 status in CYP11B2-positive cells. Firstly, we evaluated the p16-p21 status in aldosterone-producing or CYP11B2-positive cells between NA and PA cohorts considered together (APA and IHA). No significant differences were detected among those groups. We then analyzed p16 and p21 among PA cases and compared the results between APA and IHA. p16-immunoreactivity was significantly higher in IHA than APA, but not p21. (\*) is used to identify the CYP11B2-positive lesion responsible for aldosterone overproduction in the IHA group.

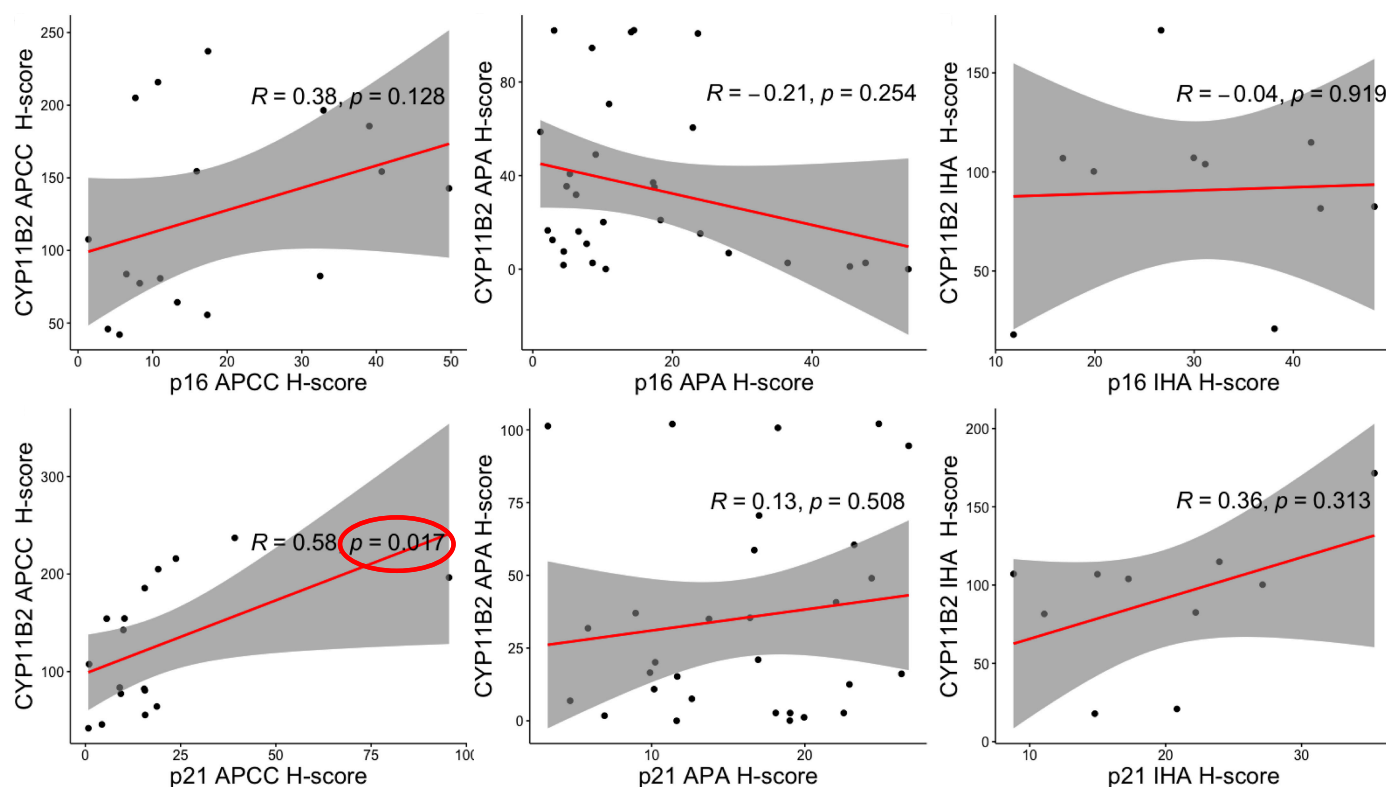

**Figure S2.** Correlations between CYP11B2 H-score and p16-p21 expression in NA, APA and IHA cohort. Correlations between CYP11B2 H-score and p16-p21 expression in NA, APA and IHA cohort. The figure shows the correlations between the CYP11B2 H-score and senescence markers in NA, APA and IHA group. The results show a significant correlation between CYP11B2 and p21 expression in APCC. The other results did not highlight significant relationships.

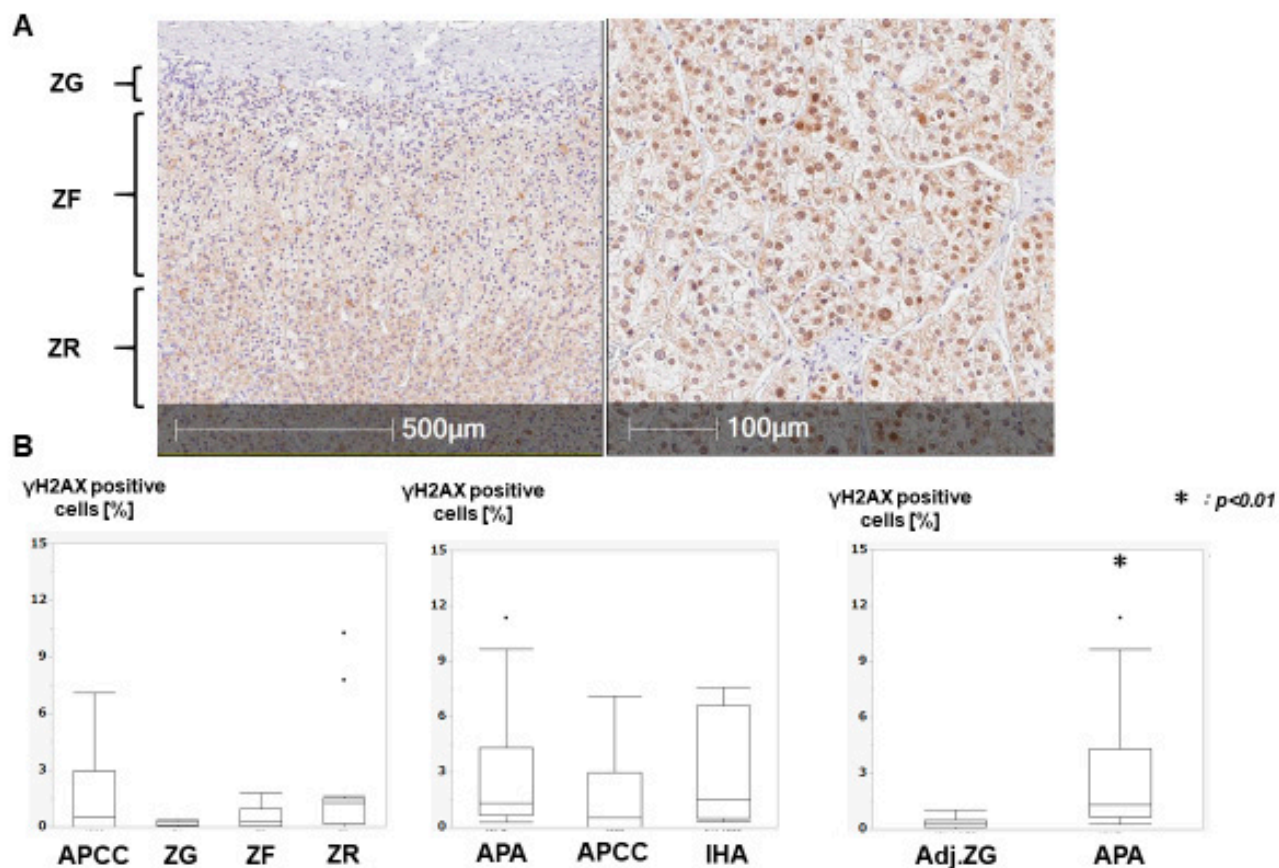

**Figure S3.**  $\gamma$ H2AX immunolocalization in NA, APA and IHA. APA: aldosterone-producing adenoma (tumor), APCC: aldosterone-producing (CYP11B2-positive) cell cluster, ZG: zona glomerulosa (CYP11B2-negative), ZF: zona fasciculata, ZR: zona reticularis, IHA: idiopathic aldosteronism (CYP11B2-positive cell clusters), Adj. ZG: adjacent zona glomerulosa to APA. "\*\*\*" means  $p < 0.01$ . (A): Representative images of  $\gamma$ H2AX immunohistochemistry in NA (left) and APA (right). (B): Comparative analysis of  $\gamma$ H2AX immunoreactivity in NA (left), aldosterone-producing (CYP11B2-positive) cells (middle) and APA (right). No significant difference of  $\gamma$ H2AX immunoreactivity was detected in NA and in CYP11B1-positive cells. However,  $\gamma$ H2AX immunoreactivity was significantly higher in the tumor area of APA than in the adjacent ZG.

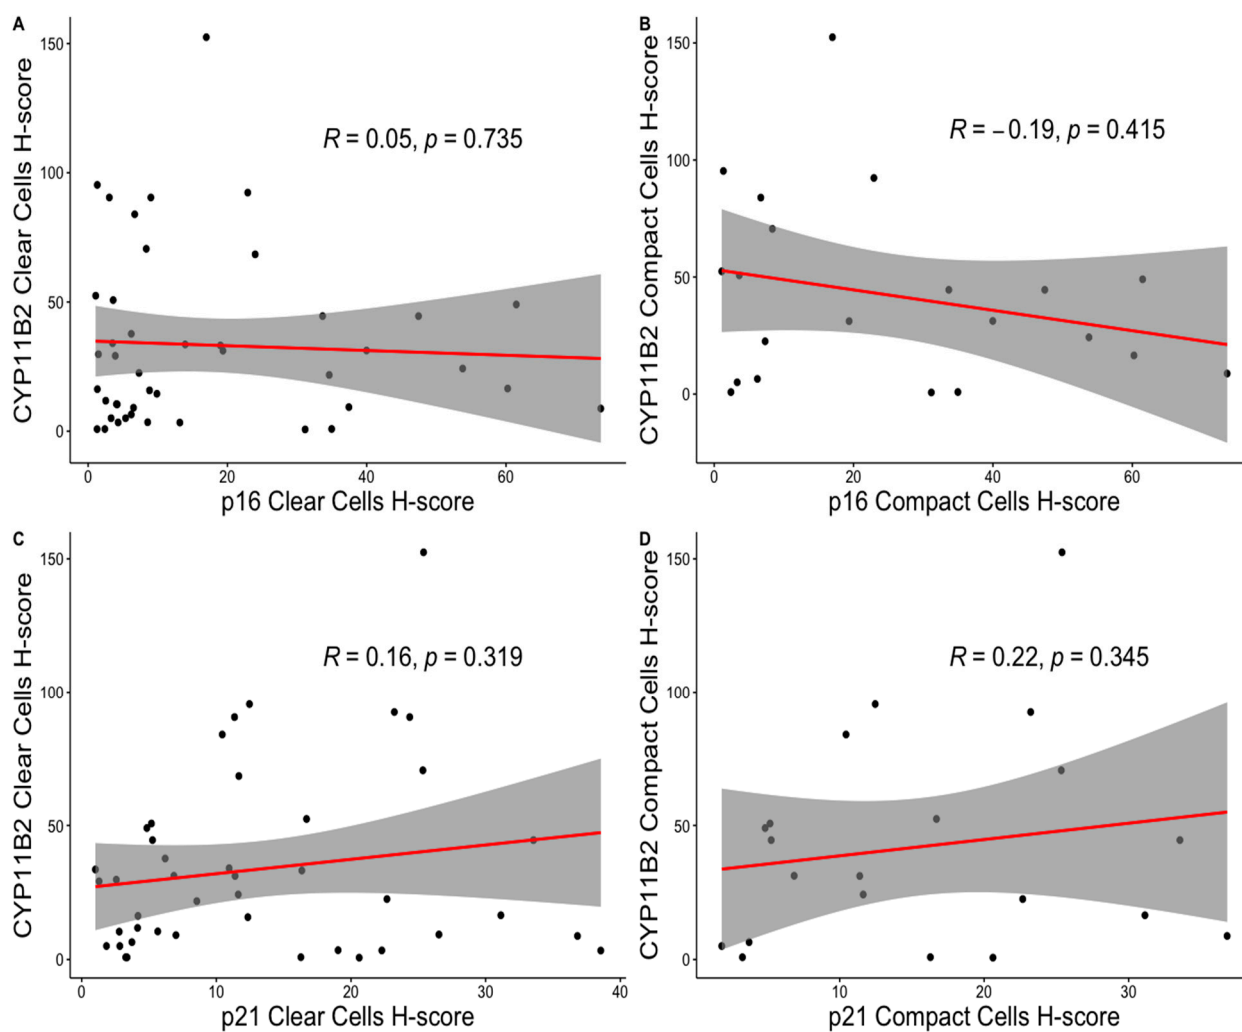

**Figure S4.** Correlations between CYP11B2 and senescence markers in clear and compact cells in APA group. The figure shows the correlations between CYP11B2 and p16-p21 expression in clear and compact cells of the APA group. The results did not show significant correlations. All the p16 and p21 values were determined using H-Score as described in the Materials and Methods Section, using HALO™ software.

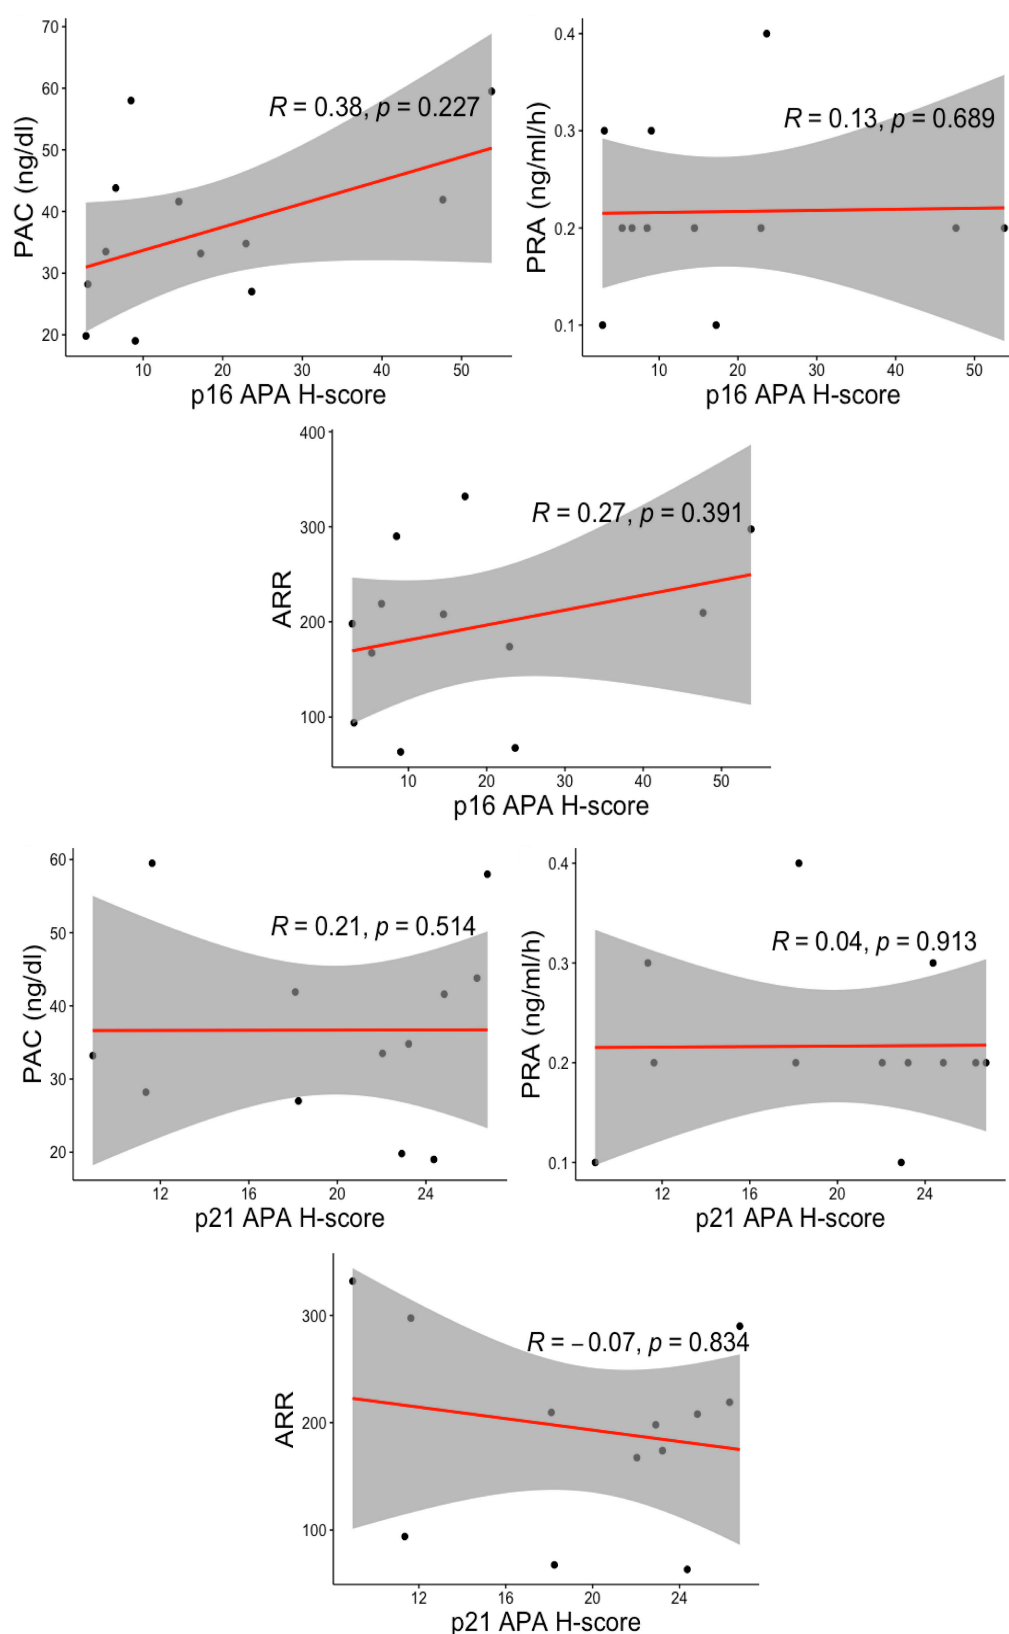

**Figure S5.** Correlations between senescence markers and clinical factors in WT APAs. Correlation between Senescence markers and clinical factors in KCNJ5-wild type group. The figure shows the correlations with the main clinical factors in the APA group. The results did not show significant correlations. PAC, plasma aldosterone concentration; PRA, plasma renin activity; ARR, aldosterone-to-renin ratio. All the p21 values were determined using H-Score as described in the Materials and Methods Section, using HALO™ software.

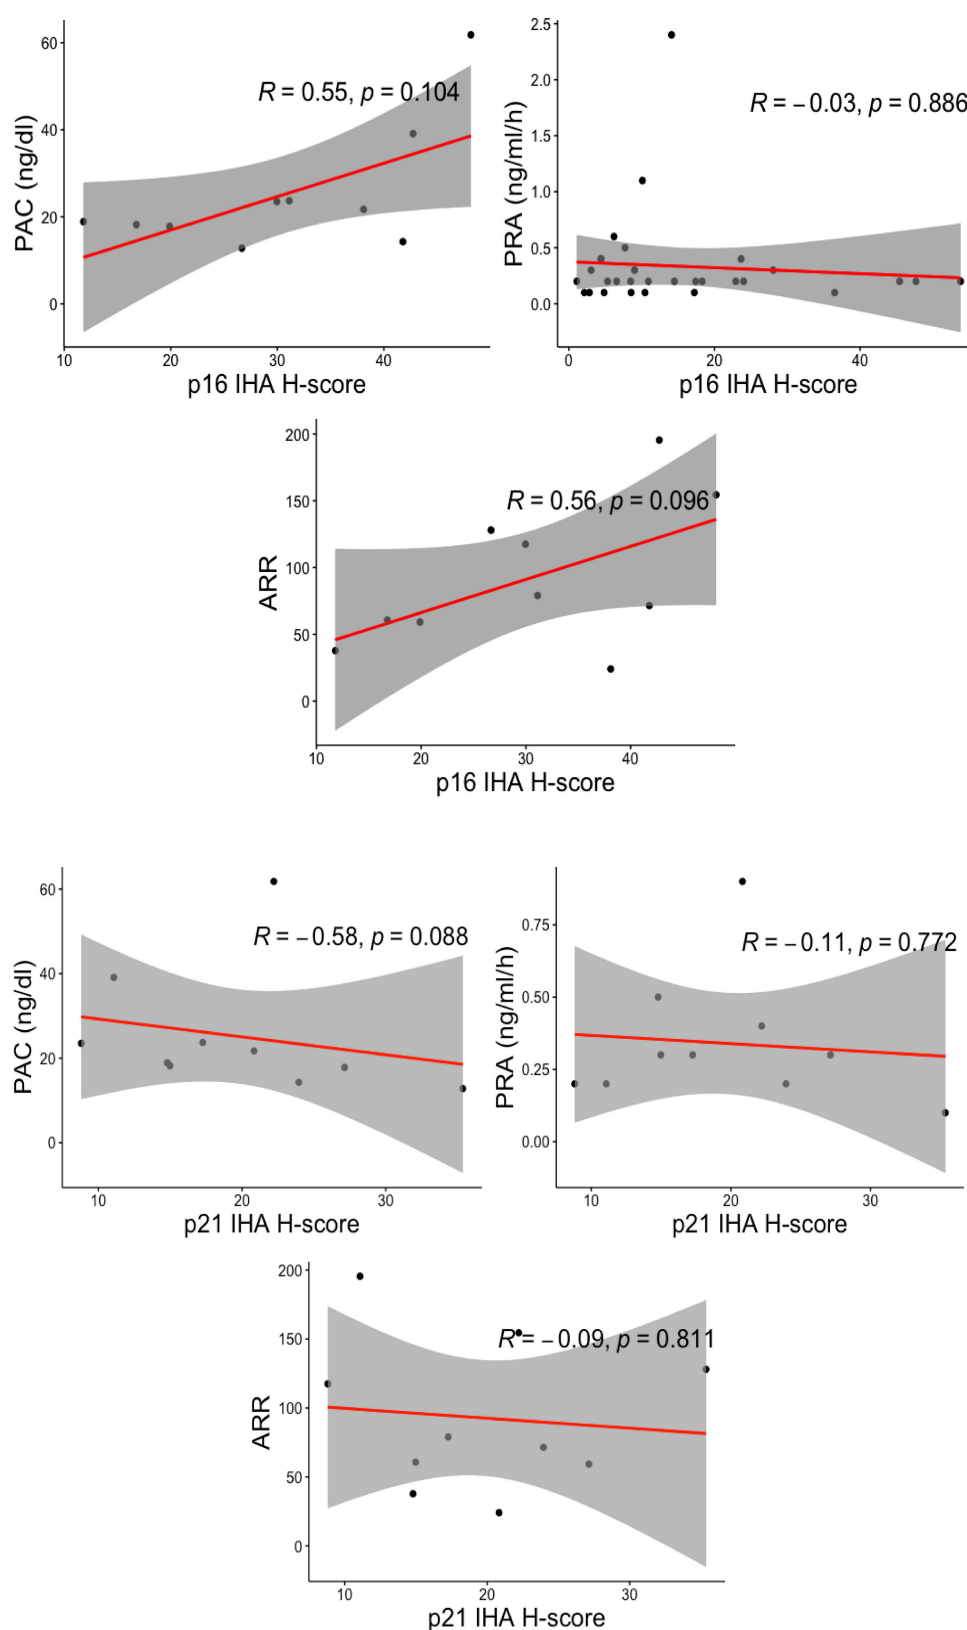

**Figure S6.** Correlations between senescence markers and clinical factors in IHA group. The figure shows the correlations with the main clinical factors in IHA patients. The results did not show significant correlations. PAC, plasma aldosterone concentration; PRA, plasma renin activity; ARR, aldosterone-to-renin ratio. All the p21 values were determined using H-Score as described in the Materials and Methods Section, using HALO™ software.
